# Supplementary material
Source: Springer Nature journal article supplement (https://www.springermedizin.de/resource/supplementary/12885_2008_1204_MOESM7_ESM.pdf/9471400)

# A. Kato III

## Doxorubicin

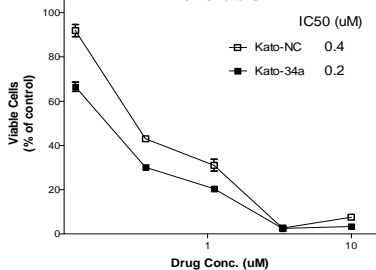

## CDDP

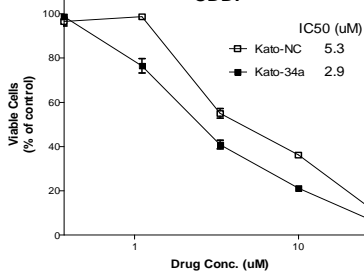

## Gemcitabine

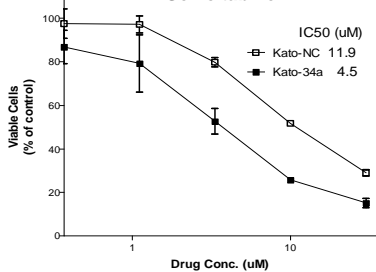

## Docetaxel

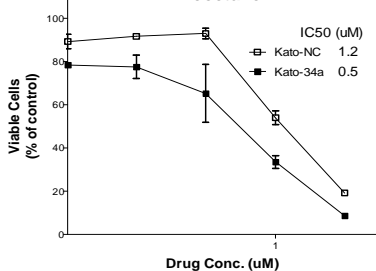

# B. MKN-45

## Doxorubicin

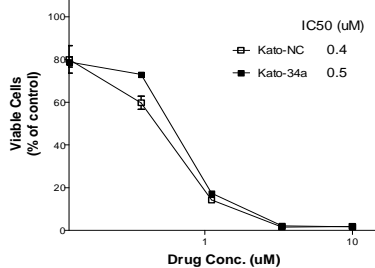

## CDDP

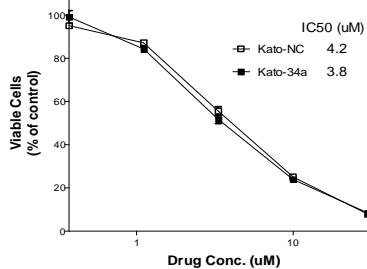

## Gemcitabine

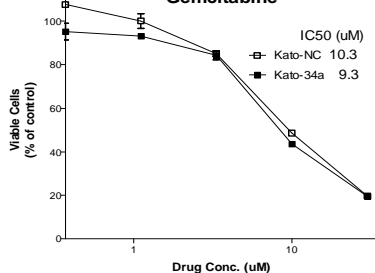

## Docetaxel

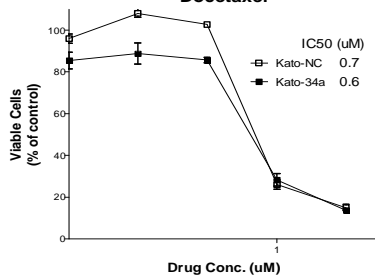

Supplement: MOESM7 [file 9471400]
